# Supplementary figures and images for: From empty evidence to implementation: A systematic search and a pragmatic package to increase nursing students’ participation in international scientific conferences
Source: Research Square preprint supplement (doi:10.21203/rs.3.rs-7868947/v1), 2025-12-17

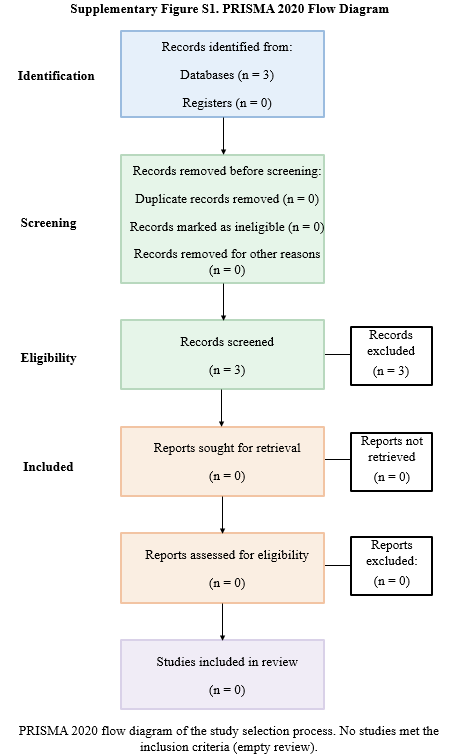

Supplement: Supplementary file 1 [file 50db5b6bb7815d8e092432ce.docx]
